# Supplementary material for: Signet ring cell variant of follicular thyroid carcinoma: Report of two cases with focus on morphological, expressional and genetic characteristics
Source: Diagn Pathol. 2019 Nov 7;14:127. doi: 10.1186/s13000-019-0904-3 (PMC6839064; doi:10.1186/s13000-019-0904-3)
Supplement: Supplementary file 1 — Additional file 1: Table S1. In silico prediction of transcription factor (TF) binding site alterations based on the PTEN intronic mutation c.209 + 11 T > G in case 2 (XLSX 25 kb) [file 13000_2019_904_MOESM1_ESM.xlsx]

## Sheet: Blad1
Supplementary Table 1. In silico prediction of transcription factor (TF) binding site alterations based on the PTEN intronic mutation c.209+11T>G in case 2
TF	Source	wt score	mut score	prediction	bayes probability gain	ppv	npv	startpos wt	endpos wt	strand wt	startpos mut	endpos mut	strand mut	result
BCL11A	hPDI	0.683	0.659	gain	0.521	71.972	n/a	14	19	minus	21	26	minus	creation of new TFBS
BRCA1	JASPAR	0.746	0.834	gain	0.506	56.197	n/a	12	18	minus	14	20	minus	no definite results
CEBPB	JASPAR	0.621	0.617	loss	0.466	n/a	74.268	14	24	plus	1	11	minus	attenuation / loss of unconfirmed TFBS
CEBPB	HT-SELEX	0.643	0.643	no change	0.000	n/a	n/a	1	10	minus	1	10	minus	attenuation / loss of unconfirmed TFBS
CEBPB	HT-SELEX	0.636	0.636	no change	0.000	n/a	n/a	1	10	minus	1	10	minus	attenuation / loss of unconfirmed TFBS
CEBPD	HT-SELEX	0.630	0.630	no change	0.000	n/a	n/a	1	10	minus	1	10	minus	no definite results
CREB1	hPDI	0.536	0.607	gain	0.871	93.009	n/a	4	9	both	15	20	minus	creation of new TFBS
CTCF	JASPAR	0.447	0.511	gain	0.963	99.046	n/a	10	28	minus	4	22	plus	creation of new TFBS
CTCF	HT-SELEX	0.417	0.462	gain	0.886	96.574	n/a	1	17	minus	2	18	minus	creation of new TFBS
E2F1	JASPAR	0.412	0.412	no change	0.000	n/a	n/a	4	14	plus	4	14	plus	creation of new TFBS
E2F1	HT-SELEX	0.457	0.457	no change	0.000	n/a	n/a	11	22	minus	11	22	minus	creation of new TFBS
E2F1	HT-SELEX	0.447	0.447	no change	0.000	n/a	n/a	11	22	minus	11	22	minus	creation of new TFBS
E2F1	HT-SELEX	0.445	0.495	gain	0.738	81.148	n/a	10	23	minus	11	24	plus	creation of new TFBS
E2F1	HT-SELEX	0.452	0.506	gain	0.569	61.499	n/a	10	23	plus	11	24	plus	creation of new TFBS
E2F4	JASPAR	0.519	0.519	no change	0.000	n/a	n/a	1	11	plus	1	11	plus	no definite results
E2F4	HT-SELEX	0.432	0.479	gain	0.566	64.692	n/a	11	22	minus	13	24	minus	no definite results
E2F4	HT-SELEX	0.418	0.418	no change	0.000	n/a	n/a	11	22	plus	11	22	plus	no definite results
E2F6	JASPAR	0.523	0.523	no change	0.000	n/a	n/a	1	11	plus	1	11	plus	no definite results
EBF1	hPDI	0.615	0.615	no change	0.000	n/a	n/a	19	25	minus	19	25	minus	no definite results
EBF1	JASPAR	0.502	0.502	no change	0.000	n/a	n/a	2	12	plus	2	12	plus	no definite results
EBF1	HT-SELEX	0.533	0.533	no change	0.000	n/a	n/a	1	14	plus	1	14	plus	no definite results
EGR1	JASPAR	0.403	0.452	gain	0.918	98.483	n/a	3	16	minus	7	20	minus	creation of new TFBS
EGR1	HT-SELEX	0.477	0.551	gain	0.988	99.810	n/a	1	14	minus	5	18	minus	creation of new TFBS
EGR1	HT-SELEX	0.479	0.564	gain	0.986	99.722	n/a	9	22	minus	9	22	minus	creation of new TFBS
ELF1	JASPAR	0.602	0.583	loss	0.366	n/a	77.582	13	25	minus	4	16	plus	attenuation / loss of unconfirmed TFBS
ELF1	HT-SELEX	0.730	0.730	no change	0.000	n/a	n/a	1	12	plus	1	12	plus	attenuation / loss of unconfirmed TFBS
ELF1	HT-SELEX	0.740	0.740	no change	0.000	n/a	n/a	1	12	plus	1	12	plus	attenuation / loss of unconfirmed TFBS
ELK1	HT-SELEX	0.700	0.700	no change	0.000	n/a	n/a	3	12	plus	3	12	plus	creation of new TFBS
ELK1	HT-SELEX	0.691	0.691	no change	0.000	n/a	n/a	3	12	plus	3	12	plus	creation of new TFBS
ELK1	HT-SELEX	0.336	0.346	gain	0.604	80.805	n/a	14	30	minus	9	25	minus	creation of new TFBS
ELK1	HT-SELEX	0.696	0.696	no change	0.000	n/a	n/a	3	12	plus	3	12	plus	creation of new TFBS
ELK4	HT-SELEX	0.674	0.674	no change	0.000	n/a	n/a	3	12	plus	3	12	plus	no definite results
ESR1	JASPAR	0.529	0.529	no change	0.000	n/a	n/a	4	23	minus	4	23	minus	no definite results
ESR1	HT-SELEX	0.483	0.483	no change	0.000	n/a	n/a	3	19	plus	3	19	plus	no definite results
ETS1	hPDI	0.815	0.815	no change	0.000	n/a	n/a	6	11	plus	6	11	plus	no definite results
ETS1	HT-SELEX	0.665	0.665	no change	0.000	n/a	n/a	3	12	plus	3	12	plus	no definite results
ETS1	HT-SELEX	0.546	0.546	no change	0.000	n/a	n/a	3	20	minus	3	20	minus	no definite results
ETS1	HT-SELEX	0.668	0.668	no change	0.000	n/a	n/a	3	12	plus	3	12	plus	no definite results
ETS1	HT-SELEX	0.483	0.483	no change	0.000	n/a	n/a	3	20	minus	3	20	minus	no definite results
FOS	JASPAR	0.638	0.638	no change	0.000	n/a	n/a	1	11	minus	1	11	minus	no definite results
FOSL1	hPDI	0.743	0.714	gain	0.519	60.549	n/a	13	21	minus	13	21	minus	creation of new TFBS
FOSL1	JASPAR	0.553	0.582	gain	0.666	96.297	n/a	14	24	plus	11	21	minus	creation of new TFBS
FOSL2	JASPAR	0.572	0.598	gain	0.772	97.761	n/a	13	23	plus	12	22	minus	creation of new TFBS
FOXA1	JASPAR	0.845	0.754	loss	0.061	n/a	89.580	9	23	plus	9	23	plus	attenuation / loss of unconfirmed TFBS
FOXM1	hPDI	0.866	0.866	no change	0.000	n/a	n/a	23	28	minus	23	28	minus	no definite results
FOXP2	JASPAR	0.857	0.738	loss	0.080	n/a	85.714	11	21	minus	11	21	minus	attenuation / loss of unconfirmed TFBS
GABPA	HT-SELEX	0.701	0.701	no change	0.000	n/a	n/a	3	12	plus	3	12	plus	no definite results
GATA2	JASPAR	0.835	0.843	gain	0.540	78.652	n/a	14	27	plus	14	27	plus	creation of new TFBS
GATA3	JASPAR	0.863	0.863	no change	0.000	n/a	n/a	18	25	minus	18	25	minus	no definite results
GATA3	HT-SELEX	0.824	0.824	no change	0.000	n/a	n/a	18	25	minus	18	25	minus	no definite results
GATA3	HT-SELEX	0.827	0.827	no change	0.000	n/a	n/a	18	25	minus	18	25	minus	no definite results
GTF2B	hPDI	0.604	0.604	no change	0.000	n/a	n/a	5	10	both	5	10	both	no definite results
GTF3C2	hPDI	0.455	0.636	gain	0.808	96.774	n/a	14	19	plus	14	19	plus	creation of new TFBS
HDAC8	hPDI	0.811	0.811	no change	0.000	n/a	n/a	22	27	minus	22	27	minus	no definite results
HNF4A	JASPAR	0.565	0.565	no change	0.000	n/a	n/a	17	31	plus	17	31	plus	contradicting predictions for this site
HNF4A	HT-SELEX	0.507	0.555	gain	0.914	98.222	n/a	16	31	minus	16	31	minus	contradicting predictions for this site
HNF4A	HT-SELEX	0.518	0.498	loss	0.278	n/a	82.322	1	16	plus	1	16	plus	contradicting predictions for this site
HNF4A	HT-SELEX	0.549	0.550	gain	0.507	93.598	n/a	16	31	minus	16	31	minus	contradicting predictions for this site
HNF4A	HT-SELEX	0.445	0.474	gain	0.764	91.981	n/a	18	31	minus	14	27	plus	contradicting predictions for this site
HNF4A	HT-SELEX	0.482	0.481	loss	0.487	n/a	74.498	1	16	plus	6	21	minus	contradicting predictions for this site
HNF4A	HT-SELEX	0.545	0.545	no change	0.000	n/a	n/a	17	31	minus	17	31	minus	contradicting predictions for this site
HNF4G	JASPAR	0.567	0.581	gain	0.698	96.774	n/a	6	20	minus	8	22	minus	creation of new TFBS
HSF1	hPDI	0.649	0.614	gain	0.534	57.991	n/a	10	16	plus	16	22	both	no definite results
HSF1	JASPAR	0.632	0.632	no change	0.000	n/a	n/a	1	15	plus	1	15	plus	no definite results
HSF1	HT-SELEX	0.600	0.600	no change	0.000	n/a	n/a	2	14	plus	2	14	plus	no definite results
HSF1	HT-SELEX	0.585	0.551	loss	0.464	n/a	66.332	10	22	minus	2	14	plus	no definite results
IRF1	hPDI	0.818	0.727	gain	0.569	66.297	n/a	15	20	minus	15	20	minus	no definite results
IRF1	JASPAR	0.647	0.623	gain	0.519	68.168	n/a	10	30	plus	5	25	plus	no definite results
IRF3	HT-SELEX	0.571	0.571	gain	0.501	59.836	n/a	7	27	minus	8	28	minus	no definite results
IRF4	HT-SELEX	0.609	0.533	loss	0.250	n/a	80.045	13	27	minus	13	27	minus	attenuation / loss of unconfirmed TFBS
JUN	JASPAR	0.654	0.629	loss	0.448	n/a	67.068	9	21	plus	12	24	minus	creation of new TFBS
JUN	JASPAR	0.603	0.655	gain	0.855	96.498	n/a	12	25	minus	12	25	minus	creation of new TFBS
JUNB	JASPAR	0.573	0.600	gain	0.830	99.370	n/a	13	23	plus	12	22	minus	creation of new TFBS
JUND	JASPAR	0.580	0.608	gain	0.646	90.049	n/a	1	11	minus	11	21	minus	creation of new TFBS
JUND	JASPAR	0.675	0.657	loss	0.486	n/a	59.306	8	22	plus	11	25	minus	creation of new TFBS
MAFF	JASPAR	0.672	0.631	loss	0.103	n/a	89.029	1	18	plus	1	18	plus	attenuation / loss of unconfirmed TFBS
MAFF	HT-SELEX	0.462	0.424	loss	0.215	n/a	84.407	12	26	plus	3	17	minus	attenuation / loss of unconfirmed TFBS
MAFK	JASPAR	0.680	0.635	loss	0.099	n/a	87.983	2	16	plus	13	27	minus	attenuation / loss of unconfirmed TFBS
MAFK	HT-SELEX	0.730	0.682	loss	0.123	n/a	87.938	6	17	minus	6	17	minus	attenuation / loss of unconfirmed TFBS
MAFK	HT-SELEX	0.585	0.526	loss	0.088	n/a	89.551	9	29	plus	9	29	plus	attenuation / loss of unconfirmed TFBS
MAFK	HT-SELEX	0.747	0.691	loss	0.096	n/a	89.217	6	17	minus	6	17	minus	attenuation / loss of unconfirmed TFBS
MAFK	HT-SELEX	0.523	0.500	loss	0.359	n/a	77.719	12	26	plus	16	30	plus	attenuation / loss of unconfirmed TFBS
MAX	JASPAR	0.630	0.756	gain	0.755	79.177	n/a	10	19	minus	10	19	minus	creation of new TFBS
MAX	HT-SELEX	0.386	0.397	gain	0.572	75.067	n/a	1	17	minus	11	27	minus	creation of new TFBS
MAX	HT-SELEX	0.598	0.730	gain	0.945	97.591	n/a	9	18	minus	9	18	minus	creation of new TFBS
MEF2A	JASPAR	0.727	0.727	no change	0.000	n/a	n/a	17	31	minus	17	31	minus	no definite results
MEF2A	HT-SELEX	0.707	0.707	no change	0.000	n/a	n/a	19	30	minus	19	30	minus	no definite results
MEF2C	JASPAR	0.687	0.681	loss	0.427	n/a	76.862	15	29	minus	15	29	minus	attenuation / loss of unconfirmed TFBS
MYBL2	HT-SELEX	0.531	0.531	no change	0.000	n/a	n/a	2	15	plus	2	15	plus	creation of new TFBS
MYBL2	HT-SELEX	0.529	0.493	loss	0.398	n/a	65.715	2	17	plus	11	26	minus	creation of new TFBS
MYBL2	HT-SELEX	0.556	0.595	gain	0.619	70.616	n/a	8	18	plus	10	20	minus	creation of new TFBS
MYBL2	HT-SELEX	0.556	0.517	loss	0.416	n/a	64.824	2	16	plus	2	16	plus	creation of new TFBS
NFATC1	HT-SELEX	0.676	0.610	loss	0.442	n/a	59.944	2	21	plus	2	21	plus	no definite results
NFATC1	HT-SELEX	0.610	0.529	loss	0.388	n/a	63.170	15	29	plus	15	29	plus	no definite results
NFATC1	HT-SELEX	0.474	0.456	loss	0.485	n/a	52.727	16	29	minus	17	30	plus	no definite results
NFE2	HT-SELEX	0.542	0.623	gain	0.539	65.867	n/a	11	21	minus	11	21	minus	no definite results
NFIC	JASPAR	0.641	0.641	no change	0.000	n/a	n/a	23	28	plus	23	28	plus	no definite results
NFYA	JASPAR	0.680	0.710	gain	0.755	94.067	n/a	13	30	plus	13	30	plus	creation of new TFBS
NFYB	JASPAR	0.565	0.541	loss	0.229	n/a	83.659	12	26	minus	9	23	minus	attenuation / loss of unconfirmed TFBS
NR2C2	JASPAR	0.511	0.512	gain	0.503	66.195	n/a	13	27	minus	6	20	plus	no definite results
NR2C2	HT-SELEX	0.456	0.476	loss	0.479	n/a	56.682	13	26	minus	14	27	plus	no definite results
NR3C1	HT-SELEX	0.592	0.675	gain	0.890	95.734	n/a	5	21	minus	5	21	minus	creation of new TFBS
NRF1	JASPAR	0.415	0.498	gain	0.998	99.904	n/a	7	17	minus	7	17	minus	creation of new TFBS
NRF1	HT-SELEX	0.500	0.590	gain	0.994	99.891	n/a	7	18	plus	7	18	plus	creation of new TFBS
PAX5	JASPAR	0.512	0.513	gain	0.508	80.931	n/a	5	23	minus	5	23	minus	creation of new TFBS
PAX5	HT-SELEX	0.570	0.576	gain	0.549	83.211	n/a	4	21	plus	4	21	plus	creation of new TFBS
POU2F2	JASPAR	0.810	0.810	no change	0.000	n/a	n/a	19	31	plus	19	31	plus	no definite results
POU2F2	HT-SELEX	0.778	0.778	no change	0.000	n/a	n/a	21	31	minus	21	31	minus	no definite results
POU2F2	HT-SELEX	0.765	0.730	loss	0.426	n/a	67.943	15	28	minus	15	28	minus	no definite results
PRDM1	JASPAR	0.598	0.557	loss	0.138	n/a	89.413	10	24	minus	5	19	plus	contradicting predictions for this site
PRDM1	HT-SELEX	0.578	0.588	gain	0.604	95.543	n/a	10	24	minus	5	19	plus	contradicting predictions for this site
RBBP5	hPDI	1.000	1.000	no change	0.000	n/a	n/a	9	14	plus	9	14	plus	no definite results
RELA	JASPAR	0.549	0.458	loss	0.021	n/a	87.302	10	19	plus	5	14	minus	attenuation / loss of unconfirmed TFBS
REST	JASPAR	0.431	0.479	gain	0.686	92.134	n/a	10	30	minus	10	30	minus	creation of new TFBS
RFX5	JASPAR	0.623	0.630	gain	0.533	82.667	n/a	3	17	minus	3	17	minus	creation of new TFBS
RFX5	HT-SELEX	0.518	0.514	loss	0.491	n/a	0.000	5	20	plus	15	30	minus	creation of new TFBS
RFX5	HT-SELEX	0.542	0.532	loss	0.480	n/a	61.669	5	20	minus	15	30	minus	creation of new TFBS
RFX5	HT-SELEX	0.542	0.532	loss	0.479	n/a	61.693	5	20	minus	15	30	minus	creation of new TFBS
RUNX3	HT-SELEX	0.525	0.554	gain	0.617	74.745	n/a	10	25	minus	5	20	minus	creation of new TFBS
RUNX3	HT-SELEX	0.587	0.687	gain	0.926	96.161	n/a	9	18	minus	11	20	minus	creation of new TFBS
RUNX3	HT-SELEX	0.516	0.583	gain	0.726	80.793	n/a	1	18	minus	12	29	minus	creation of new TFBS
RUNX3	HT-SELEX	0.603	0.711	gain	0.930	96.703	n/a	9	18	minus	11	20	minus	creation of new TFBS
RXRA	hPDI	0.545	0.585	gain	0.728	89.195	n/a	4	9	plus	15	20	minus	creation of new TFBS
RXRA	HT-SELEX	0.434	0.450	gain	0.659	87.926	n/a	18	31	minus	14	27	plus	creation of new TFBS
RXRA	HT-SELEX	0.399	0.482	gain	0.752	83.385	n/a	8	21	plus	8	21	plus	creation of new TFBS
RXRA	HT-SELEX	0.435	0.447	gain	0.621	87.055	n/a	18	31	minus	14	27	plus	creation of new TFBS
RXRA	HT-SELEX	0.404	0.488	gain	0.750	82.653	n/a	8	21	plus	8	21	plus	creation of new TFBS
SP1	JASPAR	0.347	0.420	gain	0.764	83.894	n/a	6	16	minus	7	17	minus	creation of new TFBS
SP1	HT-SELEX	0.551	0.571	gain	0.569	73.439	n/a	6	16	minus	10	20	minus	creation of new TFBS
SP1	HT-SELEX	0.602	0.746	loss	0.416	n/a	59.457	9	18	minus	9	18	minus	creation of new TFBS
SP2	JASPAR	0.370	0.441	gain	0.958	98.699	n/a	2	16	minus	6	20	minus	creation of new TFBS
SP4	HT-SELEX	0.470	0.518	gain	0.776	91.349	n/a	3	19	minus	7	23	minus	creation of new TFBS
SPI1	HT-SELEX	0.576	0.576	no change	0.000	n/a	n/a	11	24	minus	11	24	minus	no definite results
SRF	JASPAR	0.567	0.585	gain	0.544	79.518	n/a	13	30	plus	5	22	minus	creation of new TFBS
SRF	HT-SELEX	0.619	0.619	no change	0.000	n/a	n/a	17	28	minus	17	28	minus	creation of new TFBS
SRF	HT-SELEX	0.573	0.607	gain	0.566	79.771	n/a	15	30	minus	15	30	minus	creation of new TFBS
STAT1	JASPAR	0.556	0.556	no change	0.000	n/a	n/a	19	29	plus	19	29	plus	no definite results
STAT3	JASPAR	0.612	0.612	no change	0.000	n/a	n/a	19	29	plus	19	29	plus	no definite results
TCF3	hPDI	0.802	0.802	no change	0.000	n/a	n/a	20	27	minus	20	27	minus	creation of new TFBS
TCF3	HT-SELEX	0.595	0.733	gain	0.990	99.663	n/a	9	18	minus	9	18	minus	creation of new TFBS
TCF7L2	JASPAR	0.657	0.633	loss	0.380	n/a	75.436	16	29	minus	16	29	minus	attenuation / loss of unconfirmed TFBS
TEAD4	HT-SELEX	0.788	0.809	gain	0.529	63.553	n/a	7	16	minus	7	16	minus	no definite results
TFAP2A	hPDI	0.697	0.576	loss	0.469	n/a	55.106	14	23	minus	14	23	minus	contradicting predictions for this site
TFAP2A	JASPAR	0.464	0.469	gain	0.565	89.550	n/a	2	16	minus	2	16	minus	contradicting predictions for this site
TFAP2A	HT-SELEX	0.473	0.473	no change	0.000	n/a	n/a	1	12	minus	1	12	minus	contradicting predictions for this site
TFAP2A	HT-SELEX	0.474	0.474	no change	0.000	n/a	n/a	2	12	plus	2	12	plus	contradicting predictions for this site
TFAP2A	HT-SELEX	0.445	0.418	loss	0.344	n/a	76.759	16	28	minus	1	13	plus	contradicting predictions for this site
TFAP2A	HT-SELEX	0.464	0.464	no change	0.000	n/a	n/a	2	12	plus	2	12	plus	contradicting predictions for this site
TFAP2A	HT-SELEX	0.456	0.456	no change	0.000	n/a	n/a	1	12	plus	1	12	plus	contradicting predictions for this site
TFAP2A	HT-SELEX	0.410	0.387	loss	0.354	n/a	76.966	16	28	both	15	27	plus	contradicting predictions for this site
TFAP2C	hPDI	0.852	0.852	no change	0.000	n/a	n/a	22	29	plus	22	29	plus	contradicting predictions for this site
TFAP2C	JASPAR	0.463	0.464	gain	0.512	85.928	n/a	16	30	minus	2	16	minus	contradicting predictions for this site
TFAP2C	HT-SELEX	0.472	0.472	no change	0.000	n/a	n/a	1	12	plus	1	12	plus	contradicting predictions for this site
TFAP2C	HT-SELEX	0.491	0.491	no change	0.000	n/a	n/a	2	12	plus	2	12	plus	contradicting predictions for this site
TFAP2C	HT-SELEX	0.407	0.380	loss	0.317	n/a	78.879	16	28	plus	15	27	minus	contradicting predictions for this site
TFAP2C	HT-SELEX	0.474	0.474	no change	0.000	n/a	n/a	1	12	plus	1	12	plus	contradicting predictions for this site
TFAP2C	HT-SELEX	0.410	0.380	loss	0.322	n/a	77.949	16	28	minus	5	17	plus	contradicting predictions for this site
TFAP2C	HT-SELEX	0.475	0.479	gain	0.527	79.483	n/a	2	12	plus	9	19	minus	contradicting predictions for this site
THAP1	JASPAR	0.599	0.599	no change	0.000	n/a	n/a	4	12	plus	4	12	plus	no definite results
USF1	hPDI	0.475	0.650	gain	0.971	99.706	n/a	1	6	both	11	16	both	creation of new TFBS
USF1	JASPAR	0.523	0.640	gain	0.997	99.807	n/a	9	19	plus	9	19	plus	creation of new TFBS
USF1	HT-SELEX	0.549	0.680	gain	0.998	99.781	n/a	9	18	minus	9	18	minus	creation of new TFBS
USF2	hPDI	0.499	0.657	gain	0.996	99.909	n/a	1	6	both	11	16	plus	creation of new TFBS
USF2	JASPAR	0.554	0.673	gain	0.997	99.772	n/a	9	19	plus	9	19	plus	creation of new TFBS
YY1	JASPAR	0.565	0.551	loss	0.418	n/a	74.260	6	17	minus	8	19	both	attenuation / loss of unconfirmed TFBS
YY1	HT-SELEX	0.602	0.577	loss	0.229	n/a	83.885	9	19	minus	9	19	minus	attenuation / loss of unconfirmed TFBS
ZBTB33	JASPAR	0.465	0.486	gain	0.632	94.178	n/a	2	16	plus	2	16	plus	creation of new TFBS
ZBTB7A	HT-SELEX	0.530	0.629	gain	0.924	96.724	n/a	11	22	minus	11	22	minus	creation of new TFBS
ZEB1	JASPAR	0.597	0.597	no change	0.000	n/a	n/a	7	15	minus	7	15	minus	no definite results
ZNF143	HT-SELEX	0.544	0.482	loss	0.321	n/a	76.203	13	28	minus	13	28	minus	attenuation / loss of unconfirmed TFBS
ZNF263	JASPAR	0.442	0.440	loss	0.493	n/a	0.000	2	22	minus	3	23	minus	no definite results
